# Supplementary material for: SPARK - Student Perceptions and Understanding of Urology in the United Kingdom
Source: Research Square preprint supplement (doi:10.21203/rs.3.rs-7660225/v1), 2025-11-12
Supplement: Supplementary file 1 [file 24f0e7bf34cfdb27e9dab80f.pdf]

# SPARK - Student Perceptions and Understanding of Urology in the UK

*Thank you for agreeing to complete this research survey. Your responses will help advance medical education by identifying knowledge gaps and variations in exposure to urology across medical schools in the UK. All responses will remain anonymous (for those who choose to enter into the draw, email addresses will be collected and analyzed anonymously to contact those who win). By completing the survey below, you are providing your consent to participate in this study. If you'd like to remove your entry from the study please feel free to do so, participation is totally optional. A total of 10, 10GBP vouchers will be given randomly to respondents of the survey which choose to enrol into the draw. For any enquiries or more information regarding the project, or any specific concerns, please contact the project lead at rlahiji717@gmail.com.*

*\* Indicates required question*

---

1. **Please enter your academic email address if you'd like to enter into the prize draw.** (i.e. John.appleseed1@university.ac.uk) - **Optional**

---

2. **What is your gender? \***

*Mark only one oval.*

☐ Female

☐ Male

☐ Prefer not to say

☐ Other: 

---

3. **What medical school are you attending? \***

---

**4. How many years is your medical school program? \***

*Mark only one oval.*

- ☐ 4 years (A101/Post Graduate student)
- ☐ 5 years
- ☐ 6 years (Integrated degree/Intercalation)

**5. Have you heard of the specialty called urology before? \***

*Mark only one oval.*

- ☐ Yes
- ☐ No      *Skip to question 9*

**Questions about Urology****6. Are you aware that urology is one of the few mixed medical and surgical specialties? (i.e. ophthalmology, etc.) \***

*Mark only one oval.*

- ☐ Yes
- ☐ No

7. **What is your understanding of what a Urologist does in day-to-day practice? (Please select all that apply).** \*

*Check all that apply.*

- ☐ Not aware
- ☐ Diagnosing and managing urinary tract infections refractory to treatment in primary care
- ☐ Treating kidney stones
- ☐ Performing surgeries on the urinary system (i.e. robotic and minimally invasive procedures)
- ☐ Diagnosing and treating cancers of the urinary system (e.g., bladder, prostate, kidney)
- ☐ Managing male reproductive health and fertility (i.e. Erectile dysfunction, etc.)
- ☐ Managing urinary incontinence and bladder dysfunction
- ☐ Managing urological emergencies (e.g., testicular torsion, obstructed kidneys)

8. **Are you aware of the broad range of urological procedures? If so, select all that apply.** \*

*Check all that apply.*

- ☐ Not aware of the breadth of operations
- ☐ Performing minor operations (i.e. Simple stone removals, endoscopic resection of prostate, etc.)
- ☐ Performing major operations (i.e. bladder rupture and kidney laceration repairs, radical nephrectomies)
- ☐ Performing minimally invasive surgeries (i.e. robotic or laparoscopic surgery)
- ☐ Performing endoscopic operations (i.e. endoscopic resection of bladder tumors)
- ☐ Performing open procedures (i.e. Open prostatectomy)

Questions surrounding pre-clinical teaching

9. **Did you feel that the teaching provided at your medical school during preclinical years prepared you for subsequent clinical exposure to urological conditions during your clinical years?** \*

*Mark only one oval.*

- ☐ Yes      *Skip to question 11*
- ☐ No

10. **If your response to the above question was no, which of the following topics do you feel require more teaching at the preclinical level? (Select all that apply)**

*Check all that apply.*

- ☐ Female urinary issues, prolapse & Sexual health
- ☐ Male urinary issues & sexual health
- ☐ Urinary stones
- ☐ Pharmacology of medications used to treat urological conditions
- ☐ Genitourinary infections (Pyelonephritis, cystitis, urethritis, epididymitis, prostatitis, etc.)
- ☐ Embryology & malformations of the Genitourinary tract
- ☐ Kidney cancers
- ☐ Bladder cancers
- ☐ Prostate cancers & conditions
- ☐ Testicular cancers and conditions
- ☐ Penile cancers and conditions

#### Questions surrounding clinical teaching

11. **Do you believe the teaching provided at your medical school during clinical years on urological conditions was sufficient for sitting the UKMLA?**

*Mark only one oval.*

- ☐ Yes      *Skip to question 13*
- ☐ No

12. **If your response to the above question was no, which of the following topics do you feel require more teaching at the clinical level? (Select all that apply)**

- (i.e. referral criteria, red flag symptoms, how to investigate, treatment options, complications, etc.)

*Check all that apply.*

- ☐ Female urinary issues, prolapse & Sexual health
- ☐ Male urinary issues & sexual health
- ☐ Urinary stones
- ☐ Genitourinary infections (Pyelonephritis, cystitis, urethritis, epididymitis, prostatitis, etc.)
- ☐ Presentations of common genitourinary malformations (i.e. hypospadias, epispadias)
- ☐ Kidney cancers
- ☐ Bladder cancers
- ☐ Prostate cancers & conditions
- ☐ Testicular cancers and conditions
- ☐ Penile cancers and conditions

#### Clinical skills & Preparing for practise

13. **Do you feel prepared to carry out the relevant history and examination in a patient presenting with common urologic complaints (i.e. Dysuria, haematuria, hesitancy)?**

*Mark only one oval.*

- ☐ Yes
- ☐ Somewhat confident
- ☐ No

14. **Are you prepared to request and interpret investigations for such patients?**

*Mark only one oval.*

- ☐ Yes
- ☐ Somewhat prepared
- ☐ No

15. **If your response was no to any one or all of the questions above, what do you think could be done to improve the gap in medical education with regards to urological conditions?** [Please select all that apply]

*Check all that apply.*

- ☐ More urology teaching in the undergraduate curriculum
- ☐ Mandatory clinical placements in urology
- ☐ Optional urology electives or taster weeks
- ☐ Workshops or simulation sessions on common urological procedures (e.g., catheterization, scrotal examination)
- ☐ More online resources and e-learning modules about urology
- ☐ Talks or teaching sessions by urologists at medical school

16. **Would you consider a future career in Urology?**

*Mark only one oval.*

- ☐ Yes
- ☐ No
- ☐ Maybe

17. **If your response to the previous question was yes/no, what were some of the factors that drew you towards or away from urology?** (i.e. mentor, team dynamic, learning environment, etc.)

---

---

---

---

---

---

This content is neither created nor endorsed by Google.

Google Forms
